# Supplementary material for: The effects of initial acetate concentration on CO2–brine-anorthite interactions under geologic CO2 sequestration conditions
Source: Royal Society of Chemistry journal article supplement (doi:10.1039/c1ee01890f), 2011-01-01
Supplement: c1ee01890f.pdf [file c1ee01890f.pdf]

Electronic Supplementary Information for  
**The Effects of Initial Acetate Concentration on CO<sub>2</sub>–Brine–  
Anorthite Interactions under Geologic CO<sub>2</sub> Sequestration  
Conditions**

Yi Yang<sup>1</sup>, Christian Ronzio<sup>2</sup>, and Young-Shin Jun<sup>1, \*</sup>

<sup>1</sup>*Department of Energy, Environmental and Chemical Engineering,  
Washington University, St. Louis, MO 63130*

<sup>2</sup>*Department of Chemical and Environmental Engineering,  
Yale University, New Haven, CT 06520-8267*

*E-mail: [ysjun@seas.wustl.edu](mailto:ysjun@seas.wustl.edu)*

*Phone: (314) 935-4539*

*Fax: (314) 935-7211*

*<http://encl.engineering.wustl.edu/>*

Submitted: June 2011

Revised: August 2011

***Energy and Environmental Science***

\*To Whom Correspondence Should Be Addressed

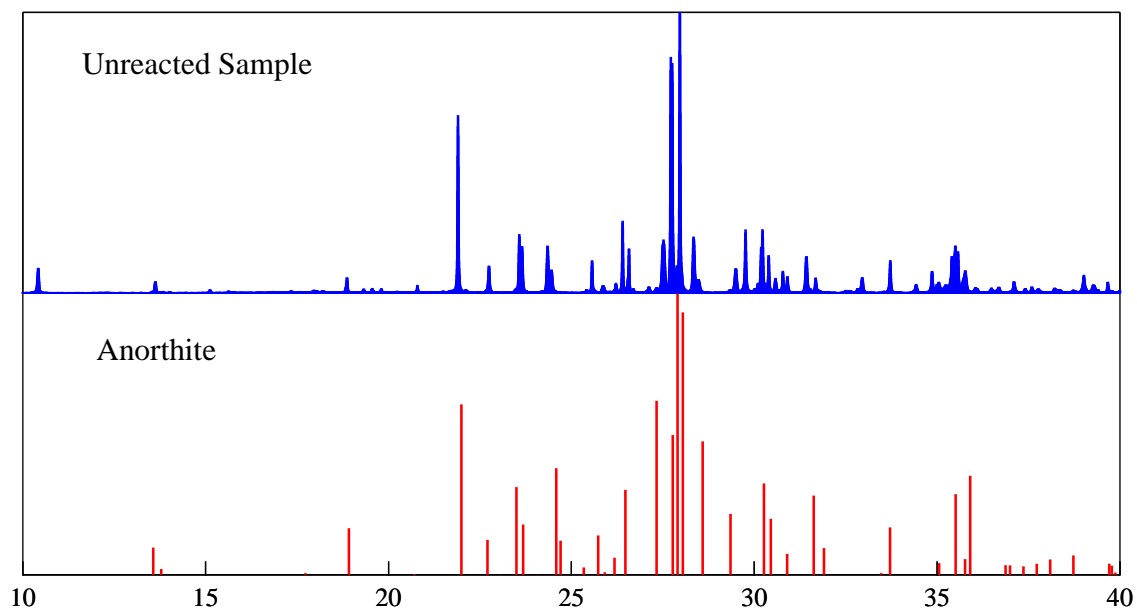

**Figure S1.** High resolution x-ray diffraction (HR-XRD) pattern of unreacted mineral used in this study. The diffraction pattern for anorthite is shown for reference.<sup>1</sup>

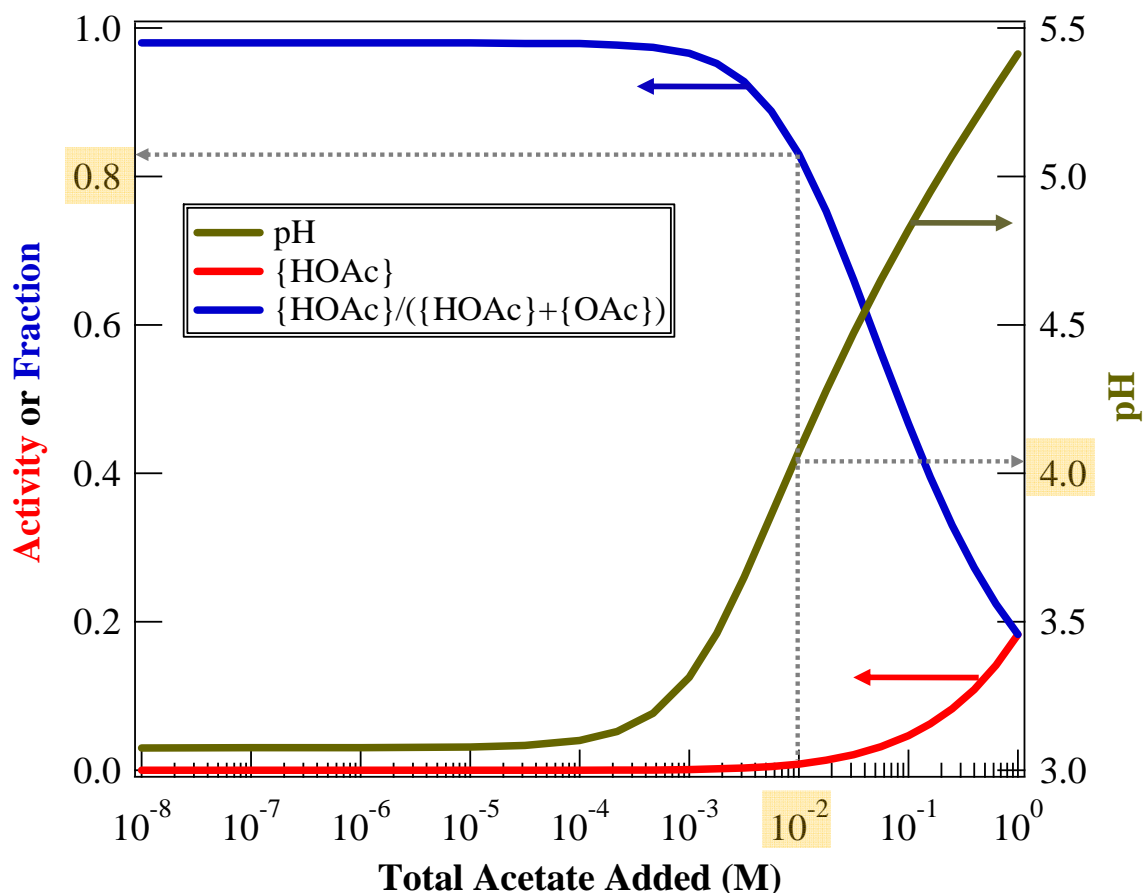

**Figure S2.** pH buffering effect of acetate added as sodium acetate trihydrate. The speciation diagram is calculated based on thermodynamic data for 35 °C.<sup>2</sup> The fugacity of CO<sub>2</sub> was estimated according to Allen et al.<sup>3</sup> Each corresponding axis for a curve is indicated by an arrow with the same color. The values on the left axis can be used for both the acetic acid fraction (blue line) and the activity of acetate (red line). Given a total amount of acetate added, the pH and the acetic acid speciation of the system can be estimated from the diagram. For example, when 10<sup>-2</sup> M total acetate is added, the pH is ~4.0 (on the black line) and approximately 82% exists as acetic acid (on the blue line). The pH and acetic acid speciation for 0.01 M total acetate added are indicated using grey lines with arrows. The effect of salinity is not accounted for in this diagram.

**Table S1.** Chemical composition of unreacted mineral used in this study, analyzed by x-ray fluorescence (XRF).

|                                    | <b>Wt.%</b>    |
|------------------------------------|----------------|
| <b>SiO<sub>2</sub></b>             | 51.829         |
| <b>TiO<sub>2</sub></b>             | 0.121          |
| <b>Al<sub>2</sub>O<sub>3</sub></b> | 23.673         |
| <b>Fe<sub>2</sub>O<sub>3</sub></b> | 4.622          |
| <b>MnO</b>                         | 0.086          |
| <b>MgO</b>                         | 3.406          |
| <b>CaO</b>                         | 13.060         |
| <b>Na<sub>2</sub>O</b>             | 3.050          |
| <b>K<sub>2</sub>O</b>              | 0.247          |
| <b>P<sub>2</sub>O<sub>5</sub></b>  | 0.006          |
| <b>Lost in Ignition (LOI)</b>      | 0.090          |
| <b>Total</b>                       | <b>100.182</b> |

## References

1. A. V. Chichagov, *Kristallographiya*, 1990, **35**, 610-616.
2. C. M. Bethke and S. Yeakel, *Reference Manual: The Geochemist's Workbench (Release 8.0)*, RockWare, Inc., Golden, 2009.
3. D. E. Allen, B. R. Strazisar, Y. Soong and S. W. Hedges, *Fuel Processing Technology*, 2005, **86**, 1569-1580.
